# Supplementary material
Source: publisher figshare collection journal article supplement (https://sage.figshare.com/ndownloader/files/13316447)
Supplement: Supplementary file 1 [file 13316447]

**Appendix 3. Test statistics regarding the identification of lag structure and main assumptions, such as stationarity, stability, and residual autocorrelation**

| <i>County</i>          | <b>Identification of lag structure</b> |            |             | <b>Test of stationarity and stability<sup>b</sup></b> |                  | <b>resid autocorr<sup>b</sup></b>             |                                      |
|------------------------|----------------------------------------|------------|-------------|-------------------------------------------------------|------------------|-----------------------------------------------|--------------------------------------|
|                        | <i>Lag</i>                             | <i>AIC</i> | <i>HQIC</i> | <i>ADF PRs</i>                                        | <i>ADF media</i> | <i>Eigenvalues<br/>inside unit<br/>circle</i> | <i>Lagrange-<br/>multiplier test</i> |
| Austria                | 2                                      | 12.223*    | 12.343*     | -6.392                                                | -6.331           | yes                                           | 3.697                                |
| France                 | 1                                      | 10.763*    | 10.835*     | -6.435                                                | -4.914           | yes                                           | 6.429                                |
| Germany                | 1                                      | 11.276*    | 11.350*     | -5.551                                                | -6.586           | yes                                           | 3.706                                |
| Germany<br>(maxlag 14) | 3                                      | 10.870*    | 11.072*     | -5.452                                                | -4.742           | yes                                           | 6.460                                |
| Greece                 | 1                                      | 11.354*    | 11.426*     | -5.856                                                | -5.491           | yes                                           | 5.302                                |
| Netherlands            | 1                                      | 9.942*     | 10.015      | -5.845                                                | -5.589           | yes                                           | 1.834                                |
| Portugal               | 1                                      | 11.093*    | 11.165*     | -4.030                                                | -5.387           | yes                                           | 3.599                                |
| UK                     | 1                                      | 9.589*     | 9.662*      | -4.305                                                | -5.923           | yes                                           | 5.295                                |

Notes: \*\*\*=p<.001. \*\*=p<.01. \*=p<.05;

<sup>a</sup> ADF tests and Lagrange-multiplier tests indicate stationarity, non-unit-root, and no residual autocorrelation by confirming the null hypothesis (i.e., not being significant)

Reading example for Austria: Two days are needed for changes in one variable to be reflected in the other, whereas AIC and HQIC are both significant at p<.05. ADF and Lagrange tests (testing the remaining autocorrelation) are non-significant; stationarity and stability are given. Eigenvalues inside the unit circle indicate non-unit-root, i.e., stability.

Source: Own data.
